# Supplementary material
Source: PubMed Central journal article supplement (PMC8217158)
Supplement: NIHMS1688361-supplement-1.pdf [file NIHMS1688361-supplement-1.pdf]

**Appendix**  
**Neighborhood Green Land Cover and Neighborhood-Based Walking in U.S. Older Adults**  
**Besser and Mitsova**

**Appendix Figure 1.** Flow diagram for obtaining final sample.

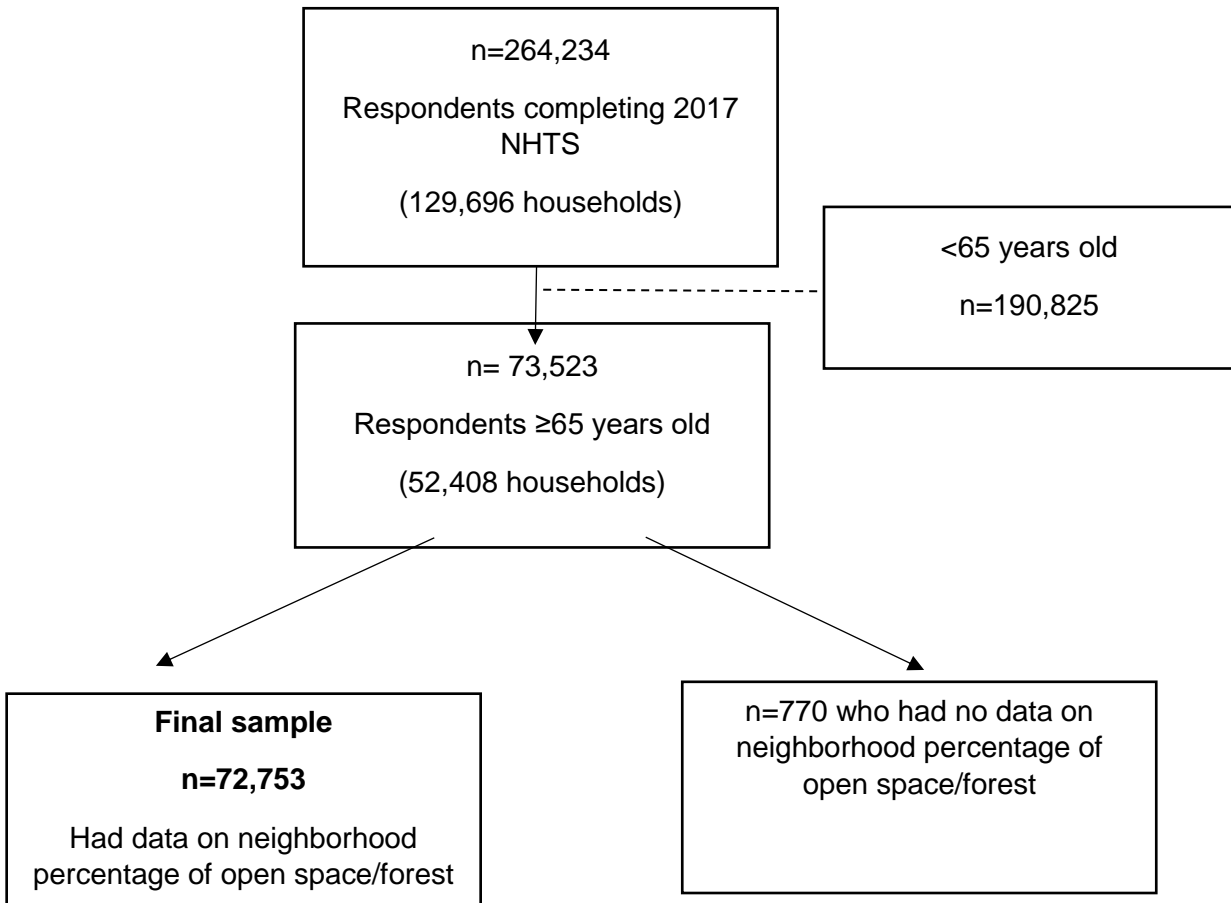

NHTS, National Household Travel Survey.

**Appendix**  
**Neighborhood Green Land Cover and Neighborhood-Based Walking in U.S. Older Adults**  
**Besser and Mltsova**

**Appendix Table 1.** Neighborhood Percentage of Open Space and Forest by Income, Sex, Race/Ethnicity, and Neighborhood Socioeconomic Disadvantage (Unweighted Estimates)

| <b>Model</b>               | <b>% neighborhood open space</b> |              | <b>% neighborhood forest</b> |              |
|----------------------------|----------------------------------|--------------|------------------------------|--------------|
|                            | <b>Mean (SD)</b>                 | <b>Range</b> | <b>Mean (SD)</b>             | <b>Range</b> |
| Full sample                | 14.0 (11.3)                      | 0.0–78.3     | 11.0% (15.3)                 | 0.0–87.4     |
| Individual income          |                                  |              |                              |              |
| Low (<\$35k/year)          | 12.7 (10.6)                      | 0.0–77.3     | 11.0 (15.1)                  | 0.0–87.4     |
| High (≥\$35k/year)         | 14.6 (11.5)                      | 0.1–77.7     | 11.1 (15.5)                  | 0.0–87.4     |
| Sex                        |                                  |              |                              |              |
| Male                       | 13.9 (11.3)                      | 0.1–78.3     | 11.3 (15.5)                  | 0.0–87.4     |
| Female                     | 14.2 (11.4)                      | 0.0–78.3     | 10.8 (15.1)                  | 0.0–87.4     |
| Race                       |                                  |              |                              |              |
| White                      | 13.9 (11.3)                      | 0.0–78.3     | 11.1 (15.5)                  | 0.0–87.4     |
| African American           | 16.3 (11.8)                      | 0.1–71.8     | 10.5 (10.9)                  | 0.0–83.1     |
| Hispanic                   | 13.6 (10.8)                      | 0.1–74.8     | 8.4 (14.6)                   | 0.0–87.4     |
| Asian                      | 14.6 (11.5)                      | 0.1–66.6     | 7.2 (11.8)                   | 0.0–84.5     |
| Other race                 | 13.1 (11.1)                      | 0.1–77.3     | 13.4 (18.4)                  | 0.0–87.4     |
| Neighborhood ADI           |                                  |              |                              |              |
| >75%ile (high deprivation) | 12.7 (10.3)                      | 0.1–60.7     | 10.1 (11.4)                  | 0.0–67.8     |
| ≤75%ile                    | 14.2 (11.5)                      | 0.0–78.3     | 11.1 (15.7)                  | 0.0–87.4     |

ADI, area deprivation index.

**Appendix**  
**Neighborhood Green Land Cover and Neighborhood-Based Walking in U.S. Older Adults**  
**Besser and Mltsova**

**Appendix Table 2.** Minutes of Neighborhood Walking by Income, Sex, Race/Ethnicity, and Neighborhood Socioeconomic Disadvantage

| <b>Model</b>               | <b>Neighborhood walking minutes/day</b> |              |
|----------------------------|-----------------------------------------|--------------|
|                            | <b>Mean (SD)</b>                        | <b>Range</b> |
| Full sample                | 4.3 (15.2)                              | 0–239        |
| Individual income          |                                         |              |
| Low (<\$35k/year)          | 4.4 (17.1)                              | 0–239        |
| High (≥\$35k/year)         | 4.3 (15.8)                              | 0–235        |
| Sex                        |                                         |              |
| Male                       | 4.6 (17.2)                              | 0–235        |
| Female                     | 4.0 (15.3)                              | 0–239        |
| Race                       |                                         |              |
| White                      | 4.3 (16.0)                              | 0–239        |
| African American           | 3.4 (15.3)                              | 0–225        |
| Hispanic                   | 4.4 (17.5)                              | 0–235        |
| Asian                      | 6.7 (19.3)                              | 0–215        |
| Other race                 | 4.7 (17.8)                              | 0–195        |
| Neighborhood ADI           |                                         |              |
| >75%ile (high deprivation) | 3.5 (15.3)                              | 0–235        |
| ≤75%ile                    | 4.4 (16.3)                              | 0–239        |

ADI, area deprivation index.

**Appendix**  
**Neighborhood Green Land Cover and Neighborhood-Based Walking in U.S. Older Adults**  
**Besser and Mitsova**

**Appendix Table 3.** Unadjusted Association Between Neighborhood Percentage of Open Space and Forest and Neighborhood Walking Minutes/Day

| <b>Model</b> | <b>Estimate (95% CI)</b> | <b><i>p</i>-value</b> |
|--------------|--------------------------|-----------------------|
| Open space   | -0.020 (-0.057, 0.0166)  | 0.28                  |
| Forest       | 0.013 (-0.009, 0.035)    | 0.23                  |
